# Supplementary material for: Mono-faceted WO3−x nanorods in situ hybridized in carbon nanosheets for ultra-fast/stable sodium-ion storage
Source: Royal Society of Chemistry journal article supplement (doi:10.1039/d0ta08659b), 2020-01-01
Supplement: d0ta08659b1.pdf [file d0ta08659b1.pdf]

## Electronic Supplementary Information

### **Mono-faceted $\text{WO}_{3-x}$ nanorods *in-situ* hybridized in carbon nanosheets for ultra-fast/stable sodium-ion storage**

Fanyan Zeng<sup>a,\*</sup>, Wanting Cheng<sup>a</sup>, Yang Pan<sup>b,\*</sup>, Maohui Yu<sup>a</sup>, Yaohui Qu<sup>a</sup>, Cailei Yuan<sup>a,\*</sup>

<sup>a</sup> Jiangxi Key Laboratory of Nanomaterials and Sensors, School of Physics, Communication and Electronics, Jiangxi Normal University, Nanchang 330022, Jiangxi, People's Republic of China

<sup>b</sup> College of Life Science, Jiangxi Normal University, Nanchang 330022, Jiangxi, People's Republic of China

\*Corresponding authors

*E-mail:* zfy1012@126.com (F. Y. Zeng); pany05@126.com (Y. Pan); clyuan@jxnu.edu.cn (C.L. Yuan)

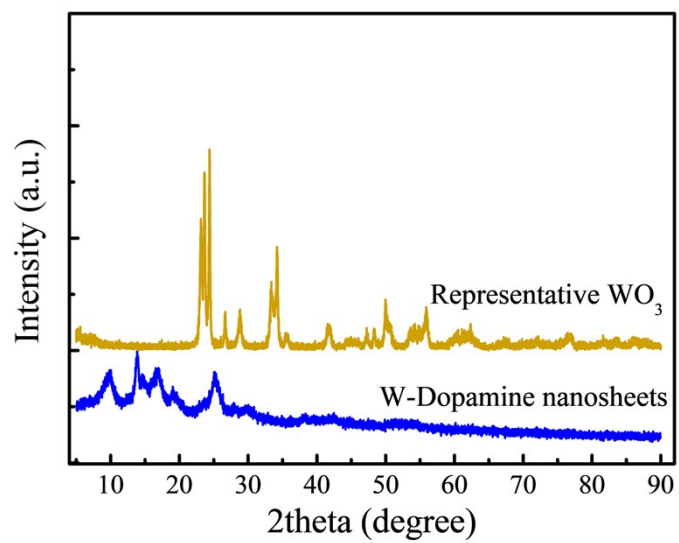

**Figure S1** XRD patterns of the W-dopamine nanosheets and representative WO<sub>3</sub>.

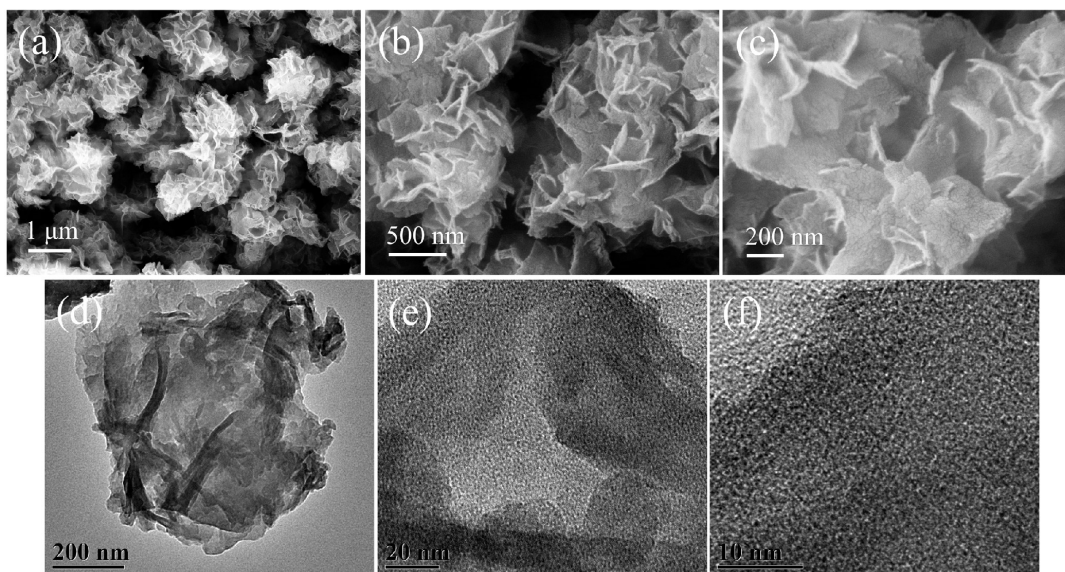

**Figure S2** (a-c) SEM and (d-f) TEM images of the W-dopamine nanosheets at different magnifications.

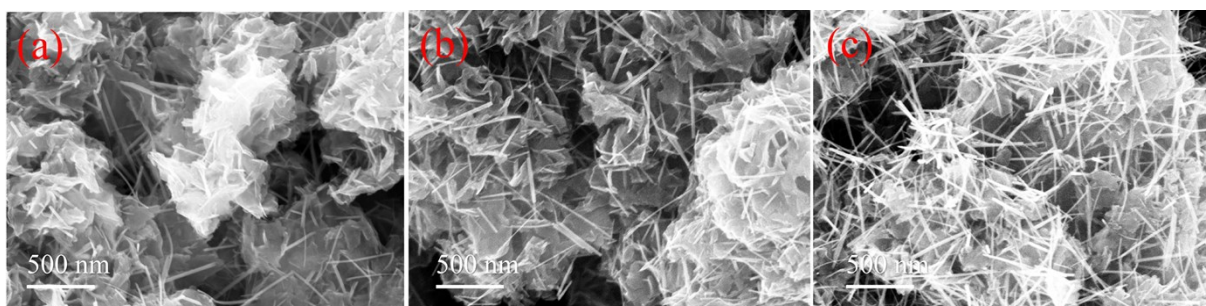

**Figure S3** SEM images of the WO<sub>3-x</sub> NRs/N-CNSs at the different annealing temperatures: (a) 500, (b) 600 and (c) 700 °C.

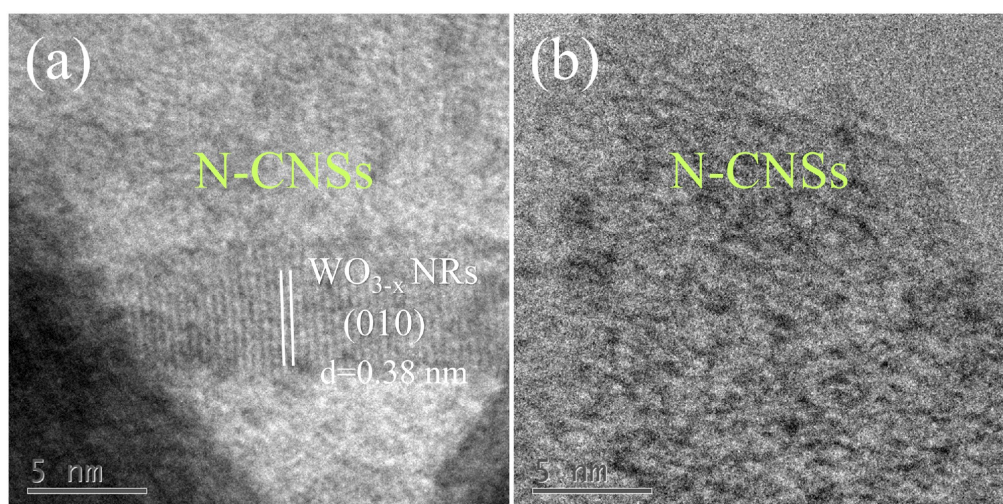

**Figure S4** (a) TEM image of the WO<sub>3-x</sub> NRs/N-CNSs and (b) the corresponding TEM image in pure carbon sites.

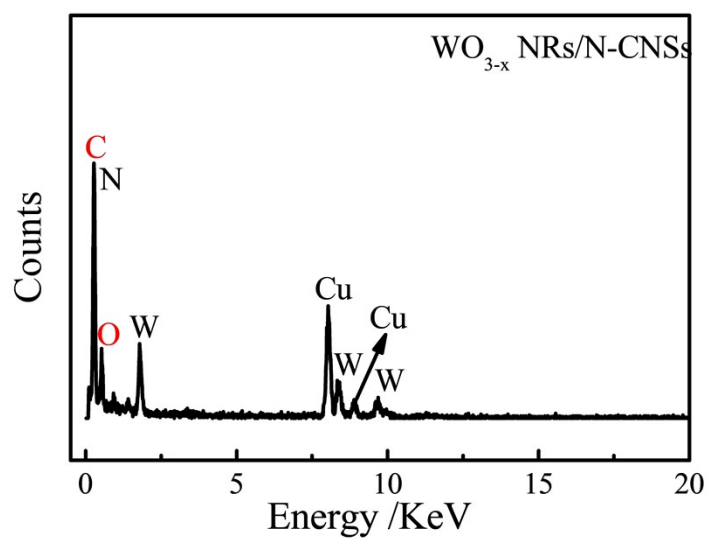

Figure S5 EDX spectrum of the  $\text{WO}_{3-x}$  NRs/N-CNSs.

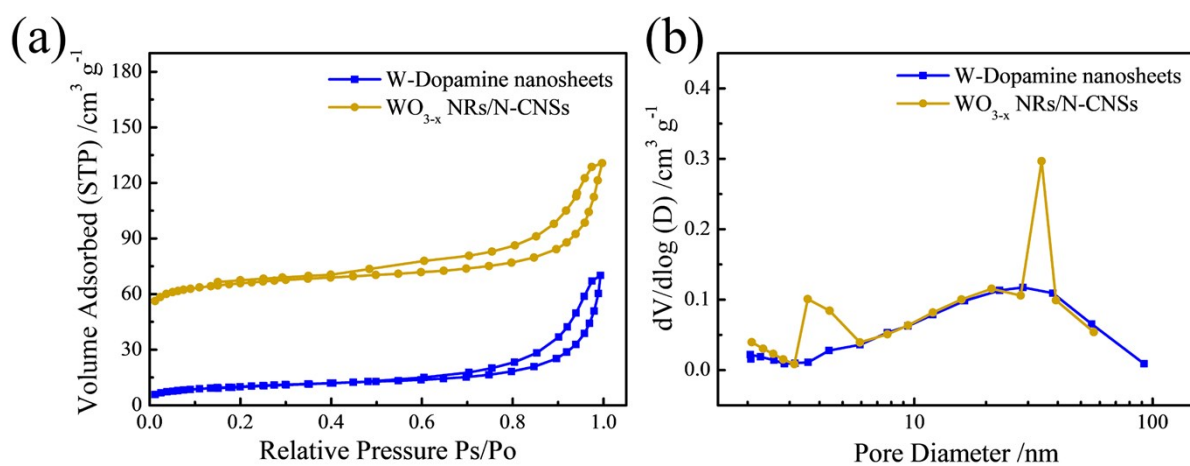

Figure S6 (a)  $\text{N}_2$  adsorption-desorption isotherms and (b) Pore-size distribution curves of the W-dopamine nanosheets and  $\text{WO}_{3-x}$  NRs/N-CNSs.

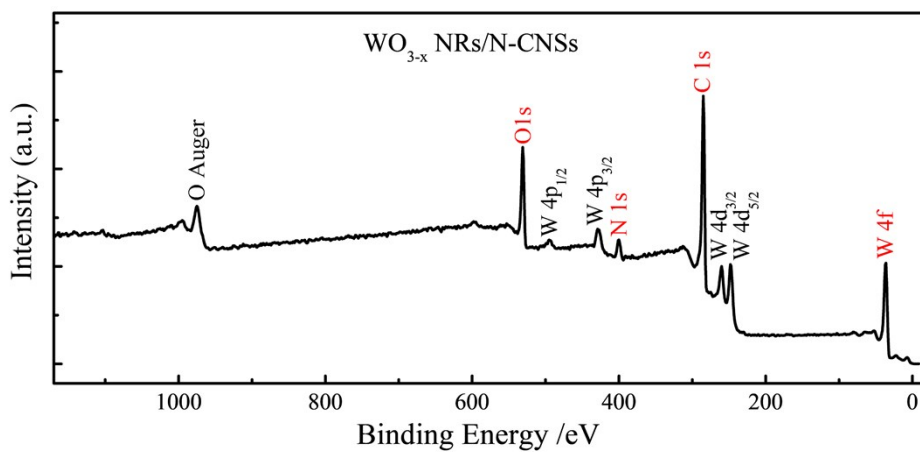

**Figure S7** XPS survey spectrum of the  $\text{WO}_{3-x}$  NRs/N-CNSs.

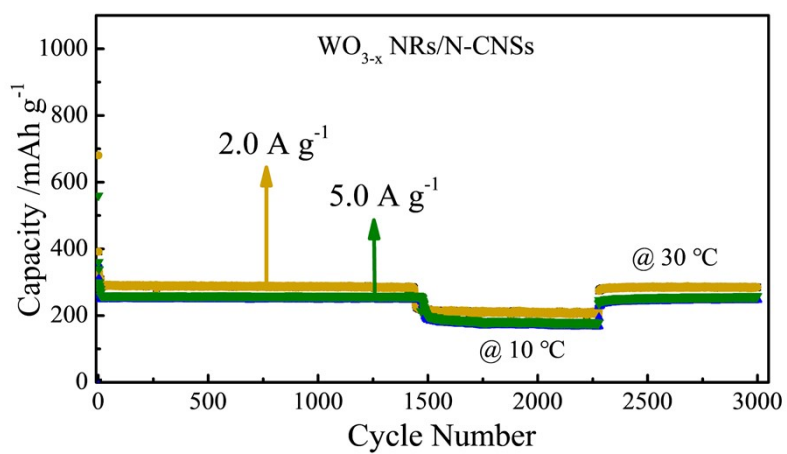

**Figure S8** High- (at 10 °C) and low- (at 30 °C) temperature cyclic stabilities of the  $\text{WO}_{3-x}$  NRs/N-CNSs at 2.0 and 5.0  $\text{A g}^{-1}$ .

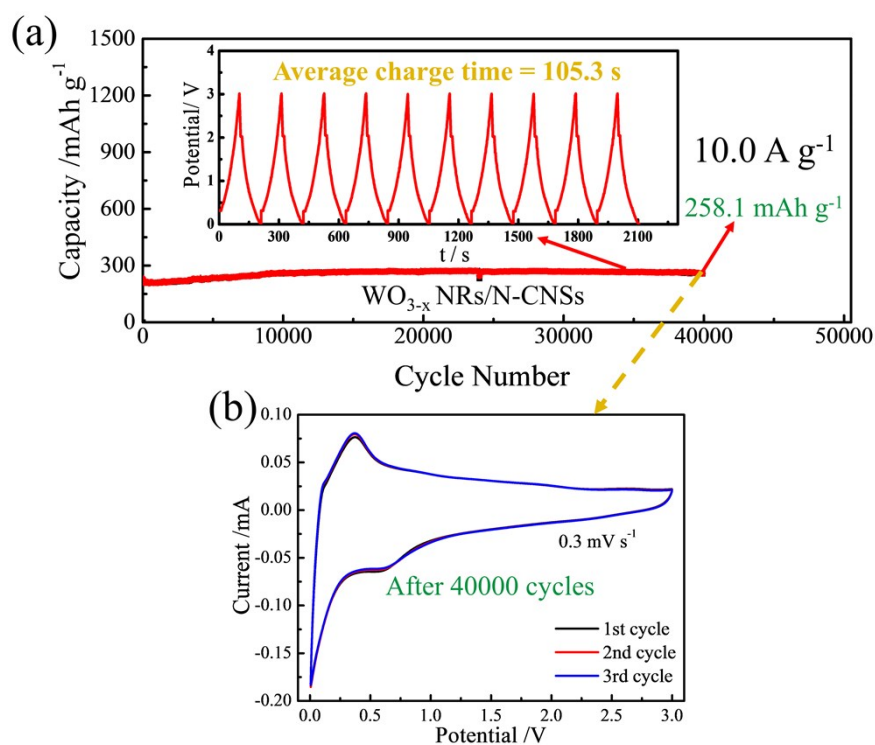

**Figure S9** (a) Ultralong cycling stability of the  $\text{WO}_{3-x}$  NRs/N-CNSs at the high current rate of  $10.0 \text{ A g}^{-1}$ , and (b) CVs at  $0.3 \text{ mV s}^{-1}$  after the 40000 cycles.

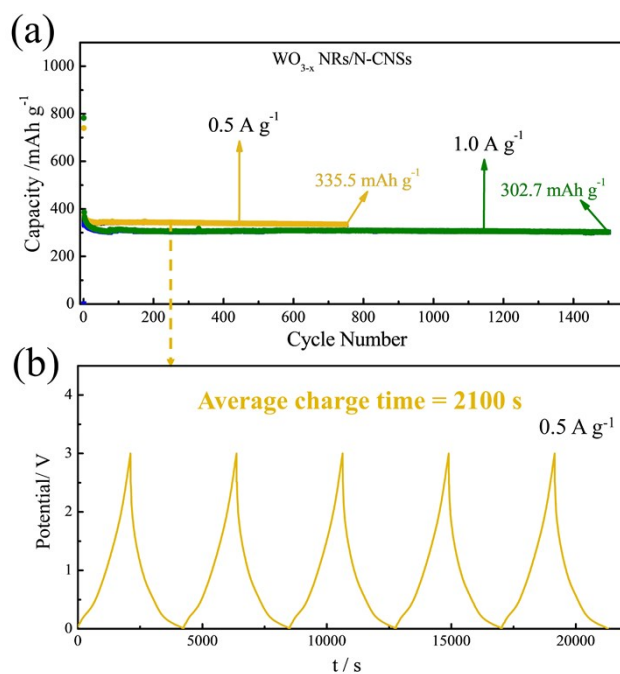

**Figure S10** (a) Cycling stabilities of the  $\text{WO}_{3-x}$  NRs/N-CNSs at the low current rates of  $0.5$  and  $1.0 \text{ A g}^{-1}$ , with (b) stable discharge/charge curves (at  $0.5 \text{ A g}^{-1}$ ).

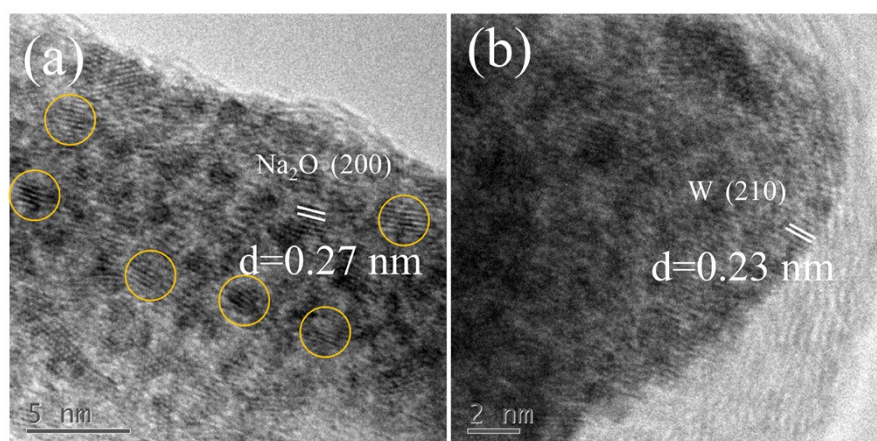

**Figure S11** (a-b) *Ex-situ* HR-TEM images of the  $\text{WO}_{3-x}$  NRs/N-CNSs after 50000 cycles at  $30.0 \text{ A g}^{-1}$  (at the charge state of 1.2 V).

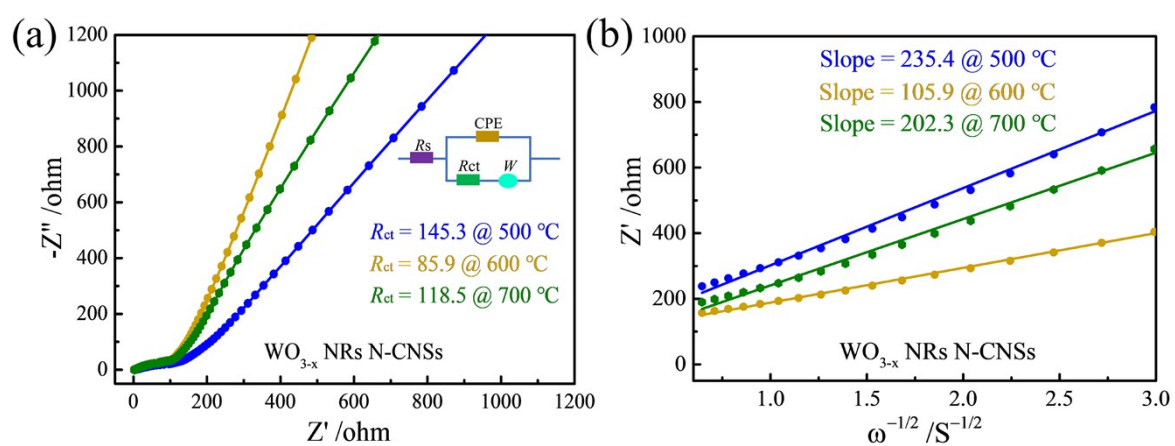

**Figure S12** (a) Nyquist plots of the  $\text{WO}_{3-x}$  NRs/N-CNSs (at 500, 600 and 700 °C) with an equivalent circuit model (inset), and (b) the fitting lines between  $Z'$  and  $\omega^{-1/2}$  after 100 cycles at  $30.0 \text{ A g}^{-1}$ .

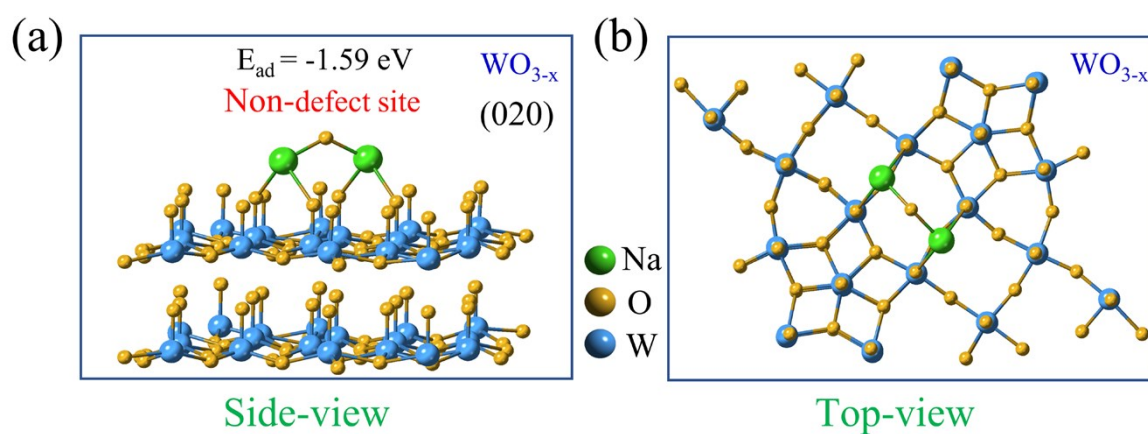

**Figure S13** Geometrically stable configuration of  $Na_2O$  adsorbed on nonstoichiometric  $WO_{3-x}$  (010 or 020) surface (non-defect site): (a) Side- and (b) Top- view.



**Equations S1:**<sup>1</sup>

$$D_{Na^+} = \frac{4}{\pi} \left( \frac{V_M}{AFZ_i} \right)^2 \left[ \frac{I_0 \left( \frac{dE}{d\delta} \right)}{\left( \frac{dE}{d\sqrt{t}} \right)} \right]^2, t \ll \frac{L^2}{D_{Na^+}}$$

(S1)

where  $D_{Na^+}$  is the ion diffusion coefficients,  $V_M$  is the molar volume,  $A$  is the contact area of electrode,  $F$  is the Faraday constant,  $Z_i$  is the valence of substance,  $I_0$  is the applied constant current,  $E$  is the electrode voltage,  $\delta$  is the stoichiometric ratio,  $t$  is the time during constant current pulse and  $L$  is the thickness of the electrode.

**Equations S2 and S3:**<sup>2,3</sup>

$$Z' = R_s + R_{ct} + \sigma \omega^{-\frac{1}{2}} \quad (S2)$$

$$D_{Na^+} = \frac{R^2 T^2}{2A^2 n^2 F^4 C^2 \sigma^2}$$

(S3)

where  $R_{ct}$  is the charge-transfer resistance,  $\omega$  is the angular frequency,  $D_{Na^+}$  is the ion diffusion coefficients, the  $R$  is the gas constant,  $T$  is the absolute temperature,  $A$  is the contact area of electrode,  $n$  is the transferred charge,  $F$  is the Faraday constant,  $C$  is the concentration of  $Na^+$  and  $\sigma$  is the Warburg impedance.

**References:**

- 1 C. J. Wen, B. A. Boukamp, R. A. Huggins and W. Weppner, *J. Electrochem. Soc.*, 1979, **126**, 2258.
- 2 N. Takami, *J. Electrochem. Soc.*, 1995, **142**, 371.
- 3 C. Ho, *J. Electrochem. Soc.*, 1980, **127**, 343.
